# Supplementary material for: A Randomized, Crossover Study of the Acute Cognitive and Cerebral Blood Flow Effects of Phenolic, Nitrate and Botanical Beverages in Young, Healthy Humans
Source: PubMed Central journal article supplement (PMC7468953; doi:10.3390/nu12082254), 2020-07-28
Supplement: nutrients-12-02254-s001.pdf [file nutrients-12-02254-s001.pdf]

Supplemental Table 1. Cognitive tasks completed at each assessment in order of presentation

| Task                                | Descriptor                                                                                                                                                                                                                                                                                                                                                               | Scoring                                     |
|-------------------------------------|--------------------------------------------------------------------------------------------------------------------------------------------------------------------------------------------------------------------------------------------------------------------------------------------------------------------------------------------------------------------------|---------------------------------------------|
| Word presentation                   | A series of words is displayed on the screen, one word at a time. In this case, 15 words were presented with a display time of 1 second and inter-stimulus interval of 1 second.                                                                                                                                                                                         | -                                           |
| Immediate word recall               | Participants are instructed to write down the words that were presented. In this case, 60 seconds were given to complete the task.                                                                                                                                                                                                                                       | Number correct and number of errors         |
| Picture presentation                | A series of photographic images are displayed on the screen, one at a time. In this case, 15 images were presented with a display time of 2 seconds and an inter-stimulus interval of 1 second.                                                                                                                                                                          | -                                           |
| Serial 3 subtractions               | Participants are required to count backwards in threes from a given number as quickly and as accurately as possible using the computer keyboard linear number keys to enter each response. A random starting number between 800 and 999 is presented on the computer screen, which is cleared by the entry of the first response. The duration of this task is 2 minutes |                                             |
| Serial 7 subtractions               | As above, counting backwards in sevens.                                                                                                                                                                                                                                                                                                                                  |                                             |
| Rapid visual information processing | A continuous series of single digits are presented in the center of the screen at the rate of 100 per minute. Participants are required to make a response when three consecutive                                                                                                                                                                                        | Accuracy (%), reaction time for the correct |

|                   |                                                                                                                                                                                                                                                                                                                                                                                                                                                                                                                                                                                                                             |                                                                                                                 |
|-------------------|-----------------------------------------------------------------------------------------------------------------------------------------------------------------------------------------------------------------------------------------------------------------------------------------------------------------------------------------------------------------------------------------------------------------------------------------------------------------------------------------------------------------------------------------------------------------------------------------------------------------------------|-----------------------------------------------------------------------------------------------------------------|
|                   | odd or three consecutive even digits are displayed. The duration of this task is 5 minutes, with 8 correct target strings presented in each minute.                                                                                                                                                                                                                                                                                                                                                                                                                                                                         | responses (ms) and false alarms (number)                                                                        |
| Stroop task       | <p>In this computerized version of the classic task, words describing one of four colors ('RED', 'YELLOW', 'GREEN', and 'BLUE') are presented in different coloured fonts in the centre of the computer screen. The participant presses one of four coloured response buttons in order to identify the font colour (e.g. if the word 'GREEN' was presented in a blue font, the correct response would be to respond with the blue button). The presented words are either 'congruent' (word and font were the same colour) or 'incongruent' (word and font were different colours) and are presented in a random order.</p> | Accuracy (%), reaction time for the correct responses (ms)                                                      |
| Peg and ball task | <p>In this computerized version of the executive function task two configurations of three coloured balls (blue, green, and red) on three pegs that each hold a maximum of three balls are presented on screen. The participants have to rearrange the balls, moving one ball at a time, from the starting configuration so that they match the position of the balls in the goal configuration. Participants randomly complete five trials at each level, which can be solved in 3, 4, and 5 moves respectively.</p>                                                                                                       | Each trial generates scores for planning times prior to moving (ms), time to complete (ms) and errors (number). |

|                             |                                                                                                                                                                                                            |                                                               |
|-----------------------------|------------------------------------------------------------------------------------------------------------------------------------------------------------------------------------------------------------|---------------------------------------------------------------|
| Delayed word recall         | Participants are instructed to write down the words that were presented to them at the beginning of the assessment. In this case, 60 seconds were given to complete the task                               | Number correct and number of errors                           |
| Delayed word recognition    | All target words that were shown during Word presentation plus an equal number of decoys are displayed on the screen one at a time. Participants indicate if they remember seeing the word earlier or not. | Accuracy (%) and reaction time for the correct responses (ms) |
| Delayed picture recognition | All target pictures shown during Picture presentation plus an equal number of decoys are displayed on the screen one at a time. Participants indicate if they remember seeing the picture earlier or not.  | Accuracy (%) and reaction time for the correct responses (ms) |

---

Supplemental Table 2. Cognitive Demand Battery. Means and standard deviations (SD) are presented.

|                             |                  |          | <u>Baseline</u> |           | <u>60 min p.d.</u> |           | <u>180 min p.d.</u> |           | <u>360 min p.d.</u> |           |      |  |
|-----------------------------|------------------|----------|-----------------|-----------|--------------------|-----------|---------------------|-----------|---------------------|-----------|------|--|
|                             | <b>Treatment</b> | <b>N</b> | <b>Mean</b>     | <b>SD</b> | <b>Mean</b>        | <b>SD</b> | <b>Mean</b>         | <b>SD</b> | <b>Mean</b>         | <b>SD</b> |      |  |
| Repetition 1                | Placebo          | 32       | 54.81           | 23.28     | 56.37              | 24.56     | 58.69               | 24.31     | 56.25               | 24.32     |      |  |
|                             | Blueberry        |          | 53.84           | 24.38     | 58.03              | 24.58     | 60.56               | 25.16     | 56.53               | 23.68     |      |  |
|                             | Apple            |          | 51.69           | 20.30     | 57.34              | 23.69     | 57.37               | 22.14     | 54.88               | 22.86     |      |  |
|                             | Coffee berry     |          | 54.16           | 24.48     | 57.12              | 24.46     | 59.97               | 23.09     | 55.31               | 21.16     |      |  |
| Repetition 2                | Placebo          |          | 51.91           | 25.16     | 54.38              | 25.81     | 56.19               | 24.49     | 53.34               | 24.19     |      |  |
|                             | Blueberry        |          | 53.91           | 25.56     | 54.28              | 26.27     | 58.09               | 24.71     | 52.47               | 21.73     |      |  |
|                             | Apple            |          | 51.53           | 22.14     | 50.69              | 22.37     | 56.16               | 22.33     | 50.75               | 21.60     |      |  |
|                             | Coffee berry     |          | 51.78           | 22.63     | 55.00              | 23.86     | 56.81               | 23.32     | 52.65               | 21.94     |      |  |
| Serial 3 subtractions       |                  |          |                 |           |                    |           |                     |           |                     |           |      |  |
| Total (number) <sup>1</sup> | Repetition 3     |          | 50.84           | 25.02     | 55.22              | 26.98     | 54.19               | 24.13     | 50.50               | 23.79     |      |  |
|                             | Blueberry        |          | 52.06           | 25.60     | 53.47              | 25.52     | 55.62               | 25.37     | 51.22               | 25.14     |      |  |
|                             | Apple            |          | 50.84           | 21.71     | 53.19              | 23.77     | 52.84               | 21.97     | 49.75               | 24.27     |      |  |
|                             | Coffee berry     |          | 49.47           | 24.07     | 55.94              | 24.03     | 55.22               | 23.84     | 51.69               | 24.52     |      |  |
| Repetition 4                | Placebo          |          | 51.06           | 25.47     | 52.16              | 23.35     | 53.84               | 25.18     | 52.81               | 24.48     |      |  |
|                             | Blueberry        |          | 51.32           | 24.58     | 53.16              | 25.11     | 55.56               | 26.91     | 54.41               | 24.69     |      |  |
|                             | Apple            |          | 48.59           | 21.23     | 53.44              | 24.40     | 54.84               | 23.15     | 52.48               | 23.14     |      |  |
|                             | Coffee berry     |          | 52.31           | 24.70     | 56.78              | 25.50     | 57.06               | 24.49     | 52.41               | 22.15     |      |  |
| Serial 3 subtractions       | Repetition 1     | Placebo  | 32              | 1.06      | 1.08               | 2.44      | 2.69                | 2.09      | 2.32                | 1.50      | 1.78 |  |

P.d.,  
post dose;  
RVIP, rapid  
visual  
information  
processing

|                              |                      |       |       |       |       |       |       |       |       |
|------------------------------|----------------------|-------|-------|-------|-------|-------|-------|-------|-------|
| Errors (number) <sup>1</sup> | Blueberry            | 1.87  | 1.56  | 2.75  | 2.26  | 1.69  | 1.87  | 1.50  | 1.72  |
|                              | Apple                | 1.44  | 1.63  | 2.19  | 2.55  | 2.13  | 2.20  | 1.56  | 1.74  |
|                              | Coffee berry         | 1.53  | 1.83  | 2.78  | 2.59  | 1.31  | 1.55  | 1.66  | 1.62  |
|                              | Repetition 2 Placebo | 2.06  | 1.92  | 2.28  | 2.69  | 1.50  | 1.55  | 1.66  | 2.10  |
| Repetition 2                 | Blueberry            | 1.66  | 1.94  | 2.69  | 2.49  | 2.16  | 1.90  | 2.31  | 2.46  |
|                              | Apple                | 1.94  | 1.95  | 2.41  | 2.60  | 1.72  | 1.76  | 1.69  | 1.84  |
|                              | Coffee berry         | 1.41  | 2.01  | 1.42  | 1.67  | 1.78  | 2.20  | 2.13  | 2.06  |
|                              | Repetition 3 Placebo | 2.66  | 2.59  | 2.28  | 2.67  | 2.13  | 2.52  | 2.41  | 1.85  |
| Repetition 3                 | Blueberry            | 3.16  | 2.74  | 3.00  | 2.98  | 2.44  | 2.34  | 2.44  | 2.34  |
|                              | Apple                | 2.09  | 2.33  | 2.84  | 2.84  | 2.22  | 2.30  | 2.19  | 2.32  |
|                              | Coffee berry         | 2.19  | 1.97  | 2.23  | 2.08  | 2.09  | 1.91  | 2.16  | 2.33  |
|                              | Repetition 4 Placebo | 3.00  | 3.07  | 2.78  | 3.58  | 2.00  | 2.53  | 1.97  | 2.66  |
| Repetition 4                 | Blueberry            | 2.23  | 2.17  | 2.66  | 2.31  | 1.47  | 1.78  | 2.06  | 2.27  |
|                              | Apple                | 2.56  | 3.05  | 2.88  | 3.29  | 1.81  | 2.05  | 2.71  | 2.66  |
|                              | Coffee berry         | 2.44  | 2.20  | 2.13  | 2.32  | 1.88  | 2.24  | 2.22  | 2.41  |
|                              | Repetition 1 Placebo | 32    | 33.28 | 17.45 | 36.59 | 18.56 | 36.81 | 19.18 | 36.31 |
| Serial 7 subtractions        | Blueberry            | 33.63 | 17.57 | 37.25 | 18.67 | 39.47 | 17.61 | 35.94 | 16.50 |
|                              | Apple                | 31.81 | 14.81 | 34.84 | 14.43 | 35.78 | 15.98 | 33.47 | 15.30 |
|                              | Coffee berry         | 32.97 | 16.19 | 36.47 | 16.90 | 37.59 | 18.94 | 36.22 | 17.96 |
| Total (number) <sup>1</sup>  | Repetition 2 Placebo | 33.84 | 18.82 | 35.59 | 16.62 | 36.47 | 18.59 | 34.37 | 16.91 |

|                              |              |    |              |       |       |       |       |       |       |       |       |
|------------------------------|--------------|----|--------------|-------|-------|-------|-------|-------|-------|-------|-------|
|                              |              |    | Blueberry    | 34.19 | 18.18 | 35.38 | 18.58 | 36.97 | 17.16 | 34.66 | 16.88 |
|                              |              |    | Apple        | 32.34 | 15.12 | 33.13 | 15.56 | 35.28 | 15.43 | 33.19 | 15.56 |
|                              |              |    | Coffee berry | 32.75 | 17.83 | 36.50 | 17.70 | 36.16 | 17.85 | 35.70 | 18.22 |
|                              | Repetition 3 |    | Placebo      | 33.75 | 18.73 | 35.44 | 17.73 | 36.03 | 18.53 | 34.44 | 15.85 |
|                              |              |    | Blueberry    | 34.63 | 18.72 | 38.14 | 19.31 | 37.19 | 18.53 | 35.48 | 16.31 |
|                              |              |    | Apple        | 32.31 | 15.23 | 31.69 | 14.96 | 35.09 | 15.83 | 31.70 | 15.74 |
|                              |              |    | Coffee berry | 31.78 | 16.34 | 36.37 | 18.13 | 34.91 | 17.07 | 34.61 | 17.41 |
|                              | Repetition 4 |    | Placebo      | 33.84 | 17.59 | 34.81 | 16.31 | 35.58 | 18.78 | 36.68 | 17.23 |
|                              |              |    | Blueberry    | 35.28 | 17.72 | 35.34 | 17.38 | 36.41 | 17.83 | 36.28 | 16.72 |
|                              |              |    | Apple        | 32.97 | 14.52 | 34.25 | 15.26 | 35.84 | 15.20 | 33.88 | 15.57 |
|                              |              |    | Coffee berry | 33.26 | 17.29 | 35.90 | 15.82 | 37.13 | 17.68 | 35.94 | 16.92 |
|                              | Repetition 1 | 32 | Placebo      | 1.09  | 1.40  | 1.31  | 1.40  | 1.87  | 2.04  | 1.75  | 2.05  |
|                              |              |    | Blueberry    | 1.66  | 1.58  | 2.34  | 2.15  | 1.88  | 2.08  | 2.00  | 2.02  |
|                              |              |    | Apple        | 1.50  | 1.52  | 2.41  | 1.72  | 2.00  | 1.85  | 1.75  | 1.72  |
|                              |              |    | Coffee berry | 2.31  | 1.64  | 1.84  | 1.53  | 2.03  | 1.93  | 1.78  | 2.01  |
| Serial 7 subtractions        | Repetition 2 |    | Placebo      | 2.16  | 2.22  | 2.41  | 1.98  | 1.72  | 1.94  | 1.97  | 1.99  |
| Errors (number) <sup>1</sup> |              |    | Blueberry    | 1.81  | 1.73  | 2.56  | 2.00  | 2.16  | 1.94  | 1.81  | 1.93  |
|                              |              |    | Apple        | 1.91  | 1.92  | 2.28  | 2.58  | 1.87  | 1.54  | 2.39  | 2.29  |
|                              |              |    | Coffee berry | 2.63  | 1.79  | 2.59  | 2.38  | 2.16  | 2.52  | 2.23  | 1.92  |
|                              | Repetition 3 |    | Placebo      | 2.31  | 2.46  | 2.78  | 2.61  | 2.31  | 2.09  | 2.75  | 2.57  |

|  |              |    |              |       |       |       |       |       |       |       |       |
|--|--------------|----|--------------|-------|-------|-------|-------|-------|-------|-------|-------|
|  |              |    | Blueberry    | 2.75  | 2.16  | 3.03  | 2.99  | 2.34  | 2.44  | 2.39  | 1.76  |
|  |              |    | Apple        | 2.28  | 2.11  | 3.41  | 2.84  | 2.28  | 2.02  | 2.47  | 1.78  |
|  |              |    | Coffee berry | 2.53  | 2.53  | 1.77  | 1.63  | 3.16  | 2.99  | 2.35  | 2.11  |
|  | Repetition 4 |    | Placebo      | 3.23  | 2.53  | 2.29  | 1.79  | 2.45  | 2.58  | 2.13  | 1.73  |
|  |              |    | Blueberry    | 2.97  | 2.16  | 2.84  | 2.19  | 2.94  | 2.40  | 2.81  | 2.75  |
|  |              |    | Apple        | 2.65  | 1.80  | 3.09  | 2.32  | 2.28  | 2.05  | 2.50  | 2.14  |
|  |              |    | Coffee berry | 2.42  | 2.03  | 2.61  | 2.60  | 2.06  | 2.11  | 2.34  | 1.94  |
|  | Repetition 1 | 32 | Placebo      | 59.90 | 20.87 | 58.75 | 22.61 | 61.00 | 19.34 | 57.80 | 18.73 |
|  |              |    | Blueberry    | 62.12 | 20.40 | 59.62 | 21.50 | 60.10 | 22.43 | 60.96 | 22.10 |
|  |              |    | Apple        | 63.75 | 18.86 | 59.42 | 20.45 | 61.44 | 17.50 | 55.96 | 17.93 |
|  |              |    | Coffee berry | 59.42 | 18.78 | 58.37 | 20.06 | 62.00 | 18.83 | 58.65 | 19.93 |
|  | Repetition 2 |    | Placebo      | 57.69 | 22.16 | 53.08 | 22.53 | 53.60 | 20.76 | 52.12 | 18.01 |
|  |              |    | Blueberry    | 58.75 | 19.36 | 56.60 | 20.87 | 57.40 | 18.62 | 54.52 | 17.99 |
|  |              |    | Apple        | 60.48 | 17.89 | 55.19 | 19.01 | 54.13 | 17.82 | 50.31 | 16.78 |
|  |              |    | Coffee berry | 56.50 | 18.87 | 58.70 | 20.20 | 55.90 | 18.85 | 55.21 | 20.48 |
|  | Repetition 3 |    | Placebo      | 55.96 | 21.48 | 57.28 | 20.28 | 51.80 | 19.77 | 54.10 | 19.24 |
|  |              |    | Blueberry    | 58.02 | 21.14 | 56.35 | 20.53 | 54.10 | 20.85 | 51.83 | 20.68 |
|  |              |    | Apple        | 56.44 | 18.91 | 53.70 | 18.65 | 53.08 | 21.74 | 49.69 | 16.07 |
|  |              |    | Coffee berry | 54.30 | 21.21 | 54.42 | 19.73 | 55.70 | 18.70 | 54.40 | 21.42 |
|  | Repetition 4 |    | Placebo      | 53.75 | 17.88 | 51.44 | 22.32 | 57.39 | 16.45 | 53.37 | 20.77 |

RVIP

% correct<sup>1</sup>

|                        |              |         |              |        |       |        |       |        |       |        |       |
|------------------------|--------------|---------|--------------|--------|-------|--------|-------|--------|-------|--------|-------|
|                        |              |         | Blueberry    | 56.67  | 19.80 | 54.62  | 19.49 | 54.50  | 19.62 | 56.35  | 18.44 |
|                        |              |         | Apple        | 53.94  | 19.15 | 54.81  | 20.37 | 52.80  | 19.41 | 49.69  | 17.90 |
|                        |              |         | Coffee berry | 52.20  | 19.30 | 55.00  | 19.01 | 54.23  | 21.42 | 52.60  | 18.06 |
|                        | Repetition 1 | Placebo | 32           | 486.88 | 47.68 | 479.64 | 55.16 | 472.66 | 51.92 | 465.91 | 58.37 |
|                        |              |         | Blueberry    | 482.91 | 66.20 | 472.78 | 51.47 | 477.25 | 52.52 | 464.06 | 46.93 |
|                        |              |         | Apple        | 473.42 | 44.37 | 479.69 | 47.80 | 469.56 | 49.01 | 460.96 | 52.78 |
|                        |              |         | Coffee berry | 480.88 | 52.05 | 465.28 | 47.71 | 470.77 | 50.95 | 472.36 | 43.57 |
|                        | Repetition 2 | Placebo |              | 493.34 | 60.76 | 478.94 | 57.74 | 482.99 | 50.82 | 477.15 | 47.02 |
|                        |              |         | Blueberry    | 493.72 | 64.15 | 480.56 | 59.60 | 485.48 | 59.31 | 484.16 | 55.86 |
|                        |              |         | Apple        | 483.72 | 48.04 | 488.25 | 51.20 | 473.92 | 51.60 | 475.41 | 59.16 |
|                        |              |         | Coffee berry | 491.04 | 49.84 | 468.65 | 50.80 | 471.05 | 54.40 | 474.65 | 62.98 |
| RVIP                   | Repetition 3 | Placebo |              | 484.74 | 48.54 | 480.57 | 52.68 | 478.88 | 41.97 | 480.17 | 58.79 |
|                        |              |         | Blueberry    | 486.35 | 65.05 | 490.00 | 60.71 | 484.73 | 55.29 | 484.21 | 47.54 |
|                        |              |         | Apple        | 481.74 | 37.06 | 472.00 | 44.30 | 484.01 | 68.44 | 480.28 | 61.11 |
|                        |              |         | Coffee berry | 488.79 | 44.64 | 484.82 | 56.62 | 470.70 | 54.06 | 474.95 | 48.86 |
|                        | Repetition 4 | Placebo |              | 485.05 | 47.17 | 474.20 | 53.79 | 477.93 | 43.68 | 471.38 | 51.75 |
|                        |              |         | Blueberry    | 483.90 | 60.94 | 494.32 | 70.83 | 475.42 | 50.53 | 472.12 | 50.79 |
|                        |              |         | Apple        | 484.56 | 45.74 | 485.81 | 48.27 | 473.53 | 53.41 | 489.63 | 59.71 |
|                        |              |         | Coffee berry | 483.58 | 55.61 | 481.46 | 53.89 | 474.97 | 57.56 | 479.34 | 61.93 |
| Alertness <sup>1</sup> | Repetition 1 | Placebo | 31           | 45.09  | 17.22 | 45.31  | 17.47 | 45.31  | 17.26 | 43.81  | 18.22 |





|              |              |       |       |       |       |       |       |       |       |
|--------------|--------------|-------|-------|-------|-------|-------|-------|-------|-------|
|              | Blueberry    | 49.66 | 20.19 | 56.75 | 18.48 | 53.47 | 20.91 | 61.84 | 16.83 |
|              | Apple        | 43.03 | 19.99 | 50.66 | 18.81 | 45.97 | 21.22 | 53.06 | 20.66 |
|              | Coffee berry | 48.69 | 20.84 | 46.72 | 21.93 | 51.81 | 22.11 | 60.31 | 20.59 |
| Repetition 3 | Placebo      | 51.47 | 23.61 | 56.59 | 19.17 | 57.94 | 19.27 | 61.31 | 21.96 |
|              | Blueberry    | 53.81 | 22.71 | 55.44 | 19.87 | 53.84 | 24.28 | 64.31 | 18.17 |
|              | Apple        | 49.59 | 21.83 | 54.75 | 19.19 | 46.19 | 22.96 | 60.47 | 18.91 |
|              | Coffee berry | 55.31 | 22.47 | 47.41 | 21.77 | 53.72 | 23.42 | 62.03 | 19.50 |
| Repetition 4 | Placebo      | 56.03 | 23.48 | 60.81 | 19.55 | 58.97 | 22.46 | 61.13 | 22.71 |
|              | Blueberry    | 57.34 | 23.04 | 56.41 | 20.43 | 56.37 | 24.40 | 64.56 | 19.29 |
|              | Apple        | 51.59 | 21.17 | 57.75 | 19.70 | 50.78 | 23.65 | 59.69 | 18.42 |
|              | Coffee berry | 57.00 | 22.78 | 48.78 | 24.65 | 55.50 | 23.20 | 66.06 | 19.59 |

---

<sup>1</sup>variable was log-transformed in the analysis

Supplemental Table 3. Cognitive and mood assessments. Means and standard deviations (SD) are presented.

|                                |                                   |                  | <u>Baseline</u> |             | <u>60 min p.d.</u> |             | <u>180 min p.d.</u> |             | <u>360 min p.d.</u> |             |           |
|--------------------------------|-----------------------------------|------------------|-----------------|-------------|--------------------|-------------|---------------------|-------------|---------------------|-------------|-----------|
|                                |                                   | <b>Treatment</b> | <b>N</b>        | <b>Mean</b> | <b>SD</b>          | <b>Mean</b> | <b>SD</b>           | <b>Mean</b> | <b>SD</b>           | <b>Mean</b> | <b>SD</b> |
| Delayed word<br>recognition    | % correct <sup>1</sup>            | Placebo          | 32              | 80.10       | 7.64               | 77.71       | 8.31                | 75.70       | 10.72               | 74.95       | 9.73      |
|                                |                                   | Blueberry        |                 | 80.31       | 11.24              | 77.82       | 9.44                | 75.67       | 7.98                | 74.37       | 10.66     |
|                                |                                   | Apple            |                 | 78.49       | 11.89              | 77.63       | 9.78                | 75.40       | 9.55                | 74.71       | 7.48      |
|                                |                                   | Coffee<br>berry  |                 | 78.96       | 10.69              | 75.00       | 8.76                | 76.15       | 9.77                | 76.04       | 9.71      |
|                                | Reaction<br>time(ms) <sup>1</sup> | Placebo          |                 | 821.29      | 217.65             | 856.52      | 325.56              | 802.91      | 187.30              | 834.89      | 231.94    |
|                                |                                   | Blueberry        |                 | 828.35      | 228.61             | 799.70      | 181.17              | 824.22      | 210.70              | 797.61      | 187.48    |
|                                |                                   | Apple            |                 | 820.19      | 180.93             | 856.92      | 228.97              | 811.84      | 171.28              | 861.58      | 227.58    |
|                                |                                   | Coffee<br>berry  |                 | 830.41      | 246.72             | 895.51      | 281.70              | 842.07      | 292.03              | 851.47      | 234.02    |
| Delayed picture<br>recognition | % correct <sup>1</sup>            | Placebo          | 32              | 91.46       | 9.20               | 87.19       | 11.71               | 88.28       | 11.28               | 88.75       | 10.36     |
|                                |                                   | Blueberry        |                 | 93.44       | 6.90               | 91.94       | 7.14                | 88.85       | 9.56                | 88.33       | 10.58     |
|                                |                                   | Apple            |                 | 92.50       | 6.67               | 90.21       | 10.33               | 89.48       | 10.30               | 90.73       | 8.54      |
|                                |                                   | Coffee<br>berry  |                 | 91.25       | 8.87               | 88.44       | 9.35                | 90.83       | 11.45               | 88.65       | 9.42      |
|                                | Reaction<br>time(ms) <sup>1</sup> | Placebo          |                 | 788.68      | 165.87             | 826.08      | 176.89              | 800.33      | 167.01              | 778.21      | 154.62    |
|                                |                                   | Blueberry        |                 | 796.05      | 148.56             | 808.22      | 168.61              | 795.05      | 152.34              | 779.40      | 176.44    |
| Apple                          |                                   |                  | 809.08          | 230.20      | 827.86             | 197.94      | 797.38              | 195.05      | 814.68              | 160.90      |           |

|                       |                               |              |    |        |        |        |        |        |        |        |        |
|-----------------------|-------------------------------|--------------|----|--------|--------|--------|--------|--------|--------|--------|--------|
|                       |                               | Coffee berry |    | 789.60 | 140.08 | 828.61 | 198.99 | 783.01 | 191.35 | 807.51 | 207.78 |
|                       |                               | Placebo      | 32 | 5.95   | 2.57   | 4.37   | 2.81   | 4.20   | 2.30   | 3.18   | 2.55   |
|                       | Correct (number) <sup>1</sup> | Blueberry    |    | 6.03   | 3.02   | 4.27   | 3.08   | 3.64   | 2.48   | 3.40   | 2.63   |
|                       |                               | Apple        |    | 5.40   | 3.05   | 3.37   | 2.20   | 3.61   | 2.32   | 2.48   | 2.01   |
|                       |                               | Coffee berry |    | 5.48   | 2.62   | 3.45   | 2.81   | 3.91   | 2.27   | 2.84   | 2.54   |
| Delayed word recall   |                               | Placebo      |    | 0.91   | 0.86   | 1.19   | 1.57   | 0.93   | 1.05   | 1.53   | 1.61   |
|                       | Errors (number) <sup>1</sup>  | Blueberry    |    | 0.75   | 1.02   | 1.19   | 1.47   | 1.34   | 1.79   | 1.39   | 1.65   |
|                       |                               | Apple        |    | 0.77   | 0.76   | 1.28   | 1.25   | 1.37   | 1.22   | 1.48   | 1.15   |
|                       |                               | Coffee berry |    | 0.81   | 1.20   | 1.71   | 1.55   | 1.50   | 1.37   | 1.84   | 1.74   |
|                       |                               | Placebo      |    | 8.31   | 2.48   | 8.28   | 2.30   | 8.38   | 2.47   | 7.85   | 1.94   |
|                       | Correct (number) <sup>1</sup> | Blueberry    |    | 8.27   | 2.71   | 8.26   | 2.25   | 7.84   | 2.01   | 7.90   | 2.42   |
|                       |                               | Apple        |    | 8.48   | 2.43   | 7.67   | 1.79   | 8.10   | 2.09   | 7.58   | 1.76   |
| Immediate word recall |                               | Coffee berry |    | 8.20   | 2.30   | 7.73   | 2.40   | 8.59   | 2.17   | 8.00   | 2.55   |
|                       |                               | Placebo      |    | 0.56   | 0.67   | 0.25   | 0.44   | 0.37   | 0.67   | 0.47   | 0.63   |
|                       | Errors (number) <sup>1</sup>  | Blueberry    |    | 0.53   | 0.80   | 0.42   | 0.67   | 0.34   | 0.55   | 0.65   | 0.71   |
|                       |                               | Apple        |    | 0.44   | 0.67   | 0.50   | 0.76   | 0.33   | 0.48   | 0.48   | 0.81   |

|                                 |                                |              |        |        |        |        |        |        |        |        |        |
|---------------------------------|--------------------------------|--------------|--------|--------|--------|--------|--------|--------|--------|--------|--------|
| Stroop                          | % correct <sup>1</sup>         | Coffee berry | 0.28   | 0.73   | 0.61   | 0.80   | 0.44   | 0.80   | 0.66   | 0.79   |        |
|                                 |                                | Placebo      | 32     | 95.78  | 5.10   | 95.62  | 5.55   | 95.94  | 3.78   | 96.61  | 3.84   |
|                                 |                                | Blueberry    |        | 97.45  | 2.96   | 95.83  | 2.74   | 97.29  | 3.51   | 96.51  | 3.12   |
|                                 |                                | Apple        |        | 96.93  | 2.28   | 96.41  | 3.06   | 95.68  | 3.69   | 96.09  | 3.30   |
|                                 |                                | Coffee berry |        | 96.30  | 3.73   | 96.04  | 4.10   | 96.30  | 3.90   | 96.15  | 3.77   |
|                                 | Reaction time(ms) <sup>1</sup> | Placebo      |        | 675.02 | 250.93 | 663.67 | 198.45 | 666.48 | 174.08 | 647.50 | 202.62 |
|                                 |                                | Blueberry    |        | 683.12 | 207.33 | 675.14 | 180.22 | 626.14 | 115.77 | 629.25 | 158.62 |
|                                 |                                | Apple        |        | 678.75 | 242.57 | 680.69 | 253.56 | 654.97 | 181.14 | 643.05 | 164.09 |
|                                 |                                | Coffee berry |        | 682.19 | 287.92 | 662.12 | 305.57 | 654.69 | 209.03 | 660.34 | 230.23 |
|                                 |                                | Placebo      | 32     | 2461.2 | 1190.3 | 2296.3 | 1042.4 | 2363.3 | 1148.7 | 2243.8 | 982.42 |
| Thinking time (ms) <sup>1</sup> | Blueberry                      |              | 2643.6 | 1261.7 | 2619.3 | 1345.7 | 2437.2 | 1299.4 | 2275.6 | 1096.6 |        |
|                                 | Apple                          |              | 2542.1 | 995.02 | 2375.8 | 1028.0 | 2431.2 | 1019.3 | 2300.5 | 980.46 |        |
|                                 | Coffee berry                   |              | 2715.3 | 1080.0 | 2675.9 | 1116.6 | 2529.3 | 1355.4 | 2235.1 | 848.62 |        |
|                                 | Placebo                        |              | 6908.5 | 1213.1 | 6682.0 | 1358.8 | 6297.9 | 968.60 | 6260.0 | 1135.4 |        |
|                                 |                                |              | 0      | 1      | 9      | 1      | 1      |        | 9      | 6      |        |

|                      |                       |              |        |        |        |        |        |        |        |        |       |
|----------------------|-----------------------|--------------|--------|--------|--------|--------|--------|--------|--------|--------|-------|
| Bond-Lader VAS       | Completion time       | Blueberry    | 7115.9 | 1585.6 | 6949.7 | 1388.4 | 6197.5 | 1101.6 | 6056.3 | 1094.7 |       |
|                      | (ms) <sup>1</sup>     | Apple        | 7050.3 | 1231.5 | 6734.4 | 1243.4 | 6444.4 | 1042.1 | 6410.8 | 1169.1 |       |
|                      |                       | Coffee berry | 7152.7 | 1498.9 | 7075.2 | 1632.7 | 6483.0 | 1234.9 | 6320.9 | 1008.2 |       |
|                      |                       | Placebo      | 2.03   | 2.16   | 2.66   | 2.60   | 3.13   | 3.15   | 2.37   | 2.65   |       |
|                      | Errors                | Blueberry    | 2.81   | 2.40   | 3.41   | 2.23   | 2.00   | 2.26   | 2.63   | 2.57   |       |
|                      | (number) <sup>1</sup> | Apple        | 2.25   | 2.37   | 2.97   | 2.72   | 2.59   | 2.35   | 2.34   | 2.36   |       |
|                      |                       | Coffee berry | 2.50   | 2.82   | 4.09   | 3.64   | 2.78   | 3.48   | 2.77   | 2.91   |       |
|                      |                       | Placebo      | 31     | 45.21  | 13.35  | 42.94  | 14.20  | 46.01  | 15.54  | 46.17  | 15.56 |
|                      | Alert                 | Blueberry    |        | 44.35  | 15.41  | 43.03  | 14.63  | 46.57  | 15.70  | 41.64  | 12.09 |
|                      |                       | Apple        |        | 46.89  | 13.51  | 45.62  | 12.68  | 49.80  | 13.32  | 44.01  | 11.21 |
|                      | Coffee berry          |              | 44.24  | 11.55  | 49.27  | 14.30  | 48.48  | 15.15  | 43.79  | 14.39  |       |
|                      | Placebo               | 31           | 61.36  | 9.76   | 59.48  | 11.64  | 59.73  | 12.22  | 60.03  | 15.01  |       |
| Content <sup>1</sup> | Blueberry             |              | 61.20  | 13.42  | 62.63  | 13.90  | 58.92  | 15.51  | 58.09  | 15.51  |       |
|                      | Apple                 |              | 60.20  | 13.41  | 60.27  | 12.82  | 58.56  | 13.22  | 58.08  | 11.26  |       |
|                      | Coffee berry          |              | 58.89  | 10.23  | 59.39  | 11.99  | 58.34  | 12.33  | 57.20  | 14.21  |       |
| Calm <sup>1</sup>    | Placebo               | 31           | 55.85  | 12.90  | 55.74  | 13.43  | 54.94  | 14.27  | 57.68  | 13.54  |       |

|            |                              |              |       |       |       |       |       |       |       |       |       |
|------------|------------------------------|--------------|-------|-------|-------|-------|-------|-------|-------|-------|-------|
| VAS        | Clear mind <sup>1</sup>      | Blueberry    |       | 57.11 | 12.77 | 58.34 | 11.07 | 58.86 | 12.79 | 56.99 | 10.62 |
|            |                              | Apple        |       | 57.90 | 13.00 | 59.21 | 10.21 | 60.11 | 11.81 | 59.34 | 13.42 |
|            |                              | Coffee berry |       | 56.98 | 8.65  | 59.38 | 11.17 | 58.67 | 11.61 | 57.66 | 11.80 |
|            | Focused                      | Placebo      | 32    | 42.59 | 16.99 | 43.31 | 16.66 | 42.88 | 17.91 | 46.72 | 18.98 |
|            |                              | Blueberry    |       | 41.59 | 16.79 | 42.19 | 17.18 | 44.31 | 16.97 | 38.47 | 15.34 |
|            |                              | Apple        |       | 45.41 | 16.68 | 43.66 | 16.66 | 45.41 | 16.12 | 41.28 | 17.71 |
|            | Problem solving <sup>1</sup> | Coffee berry |       | 41.81 | 16.51 | 44.69 | 16.52 | 41.28 | 17.89 | 39.47 | 17.22 |
|            |                              | Placebo      | 32    | 39.72 | 16.25 | 40.88 | 16.86 | 44.16 | 19.72 | 43.47 | 18.26 |
|            |                              | Blueberry    |       | 44.97 | 17.42 | 41.56 | 15.50 | 45.81 | 19.14 | 38.16 | 15.49 |
|            | Productive                   | Apple        |       | 46.88 | 15.93 | 44.94 | 16.58 | 49.13 | 17.16 | 42.94 | 15.59 |
|            |                              | Coffee berry |       | 40.78 | 13.68 | 47.03 | 16.29 | 44.78 | 18.40 | 38.59 | 16.49 |
|            |                              | Placebo      | 32    | 46.66 | 16.11 | 46.72 | 16.08 | 47.66 | 20.25 | 47.44 | 20.30 |
|            | Productive                   | Blueberry    |       | 46.13 | 17.52 | 42.75 | 19.05 | 48.31 | 19.30 | 42.06 | 15.69 |
|            |                              | Apple        |       | 46.63 | 16.27 | 44.00 | 16.14 | 51.19 | 17.39 | 44.66 | 17.09 |
|            | Productive                   | Coffee berry |       | 44.31 | 15.78 | 49.50 | 17.84 | 48.09 | 19.10 | 45.84 | 18.15 |
| Placebo    |                              | 32           | 42.34 | 15.10 | 42.44 | 17.46 | 44.56 | 19.56 | 42.84 | 18.13 |       |
| Productive | Blueberry                    |              | 41.87 | 16.53 | 41.72 | 17.18 | 43.00 | 18.85 | 37.00 | 16.89 |       |

|                 |       |       |       |       |       |       |       |       |
|-----------------|-------|-------|-------|-------|-------|-------|-------|-------|
| Apple           | 45.72 | 16.24 | 43.59 | 15.66 | 47.72 | 17.68 | 44.34 | 16.27 |
| Coffee<br>berry | 41.25 | 16.63 | 47.28 | 17.75 | 48.44 | 16.18 | 43.00 | 17.48 |

---

P.d., post dose; VAS, visual analogue scales

<sup>1</sup>variable was log-transformed in the analysis



Supplemental Table 4. Profile of Mood States. Mean and standard deviations (SD) are presented.

| Subscale                            | Treatment    | N  | <u>Baseline</u> |      | <u>60 min p.d.</u> |      | <u>180 min p.d.</u> |      | <u>360 min p.d.</u> |      |
|-------------------------------------|--------------|----|-----------------|------|--------------------|------|---------------------|------|---------------------|------|
|                                     |              |    | Mean            | SD   | Mean               | SD   | Mean                | SD   | Mean                | SD   |
| Anger/Hostility <sup>1</sup>        | Placebo      | 32 | 1.94            | 2.83 | 2.81               | 4.55 | 3.00                | 4.64 | 2.68                | 5.26 |
|                                     | Blueberry    |    | 3.13            | 5.68 | 2.68               | 4.95 | 2.52                | 5.60 | 2.90                | 5.88 |
|                                     | Apple        |    | 3.10            | 5.44 | 2.44               | 4.59 | 1.84                | 3.73 | 2.97                | 6.35 |
|                                     | Coffee berry |    | 2.44            | 4.60 | 2.47               | 5.26 | 2.47                | 4.75 | 2.97                | 6.34 |
| Confusion/Bewilderment <sup>1</sup> | Placebo      | 32 | 11.28           | 6.30 | 12.03              | 5.88 | 11.56               | 5.96 | 11.71               | 5.38 |
|                                     | Blueberry    |    | 12.61           | 7.54 | 12.55              | 7.10 | 11.13               | 6.46 | 12.10               | 6.68 |
|                                     | Apple        |    | 11.77           | 6.81 | 11.56              | 6.40 | 11.66               | 6.97 | 12.39               | 6.41 |
|                                     | Coffee berry |    | 11.81           | 4.97 | 9.47               | 5.28 | 10.38               | 5.80 | 11.22               | 5.64 |
| Depression/Dejection <sup>1</sup>   | Placebo      | 32 | 3.53            | 5.05 | 4.59               | 6.61 | 4.13                | 5.74 | 4.13                | 6.52 |
|                                     | Blueberry    |    | 5.48            | 8.35 | 4.52               | 7.87 | 4.32                | 7.87 | 4.68                | 8.32 |
|                                     | Apple        |    | 3.94            | 8.87 | 4.03               | 6.98 | 3.59                | 7.51 | 3.77                | 6.94 |
|                                     | Coffee berry |    | 3.09            | 5.59 | 3.47               | 6.57 | 3.09                | 5.94 | 3.88                | 7.22 |
| Fatigue/Inertia <sup>1</sup>        | Placebo      | 32 | 8.66            | 6.02 | 8.78               | 5.00 | 8.34                | 5.45 | 9.77                | 5.18 |
|                                     | Blueberry    |    | 8.81            | 6.36 | 9.06               | 6.26 | 7.00                | 5.94 | 10.10               | 6.62 |
|                                     | Apple        |    | 8.29            | 6.56 | 7.63               | 5.61 | 7.78                | 6.20 | 9.77                | 5.92 |
|                                     | Coffee berry |    | 8.37            | 5.54 | 6.38               | 5.76 | 7.06                | 6.04 | 9.03                | 6.30 |
| Tension/Anxiety <sup>1</sup>        | Placebo      | 32 | 6.22            | 6.33 | 7.06               | 5.67 | 6.94                | 5.49 | 6.84                | 5.36 |

|                                           |              |    |       |       |       |       |       |       |       |       |
|-------------------------------------------|--------------|----|-------|-------|-------|-------|-------|-------|-------|-------|
|                                           | Blueberry    |    | 7.19  | 6.77  | 7.03  | 6.40  | 7.35  | 7.08  | 7.90  | 8.17  |
|                                           | Apple        |    | 6.97  | 7.03  | 5.53  | 5.10  | 6.06  | 6.06  | 7.19  | 6.22  |
|                                           | Coffee berry |    | 7.03  | 6.46  | 6.09  | 5.99  | 6.50  | 5.02  | 7.22  | 7.16  |
|                                           | Placebo      | 32 | 9.81  | 5.99  | 7.56  | 5.87  | 9.53  | 6.43  | 8.81  | 6.51  |
| Vigour/Activity <sup>1</sup>              | Blueberry    |    | 9.00  | 6.00  | 8.19  | 5.79  | 10.65 | 6.92  | 7.81  | 5.29  |
|                                           | Apple        |    | 9.00  | 5.81  | 8.63  | 6.36  | 9.63  | 5.24  | 8.13  | 5.51  |
|                                           | Coffee berry |    | 8.69  | 5.13  | 11.12 | 7.92  | 10.13 | 7.62  | 9.81  | 6.83  |
|                                           | Placebo      | 32 | 21.81 | 25.86 | 27.72 | 24.62 | 24.44 | 26.29 | 26.32 | 23.01 |
| Total Mood Disturbance (TMD) <sup>1</sup> | Blueberry    |    | 28.23 | 32.41 | 27.65 | 28.33 | 21.68 | 30.32 | 29.87 | 30.97 |
|                                           | Apple        |    | 25.06 | 31.32 | 22.56 | 25.48 | 21.31 | 27.37 | 27.97 | 28.12 |
|                                           | Coffee berry |    | 24.06 | 22.29 | 16.75 | 26.63 | 19.37 | 25.24 | 24.50 | 28.97 |

---

<sup>1</sup>variable was log-transformed in the analysis

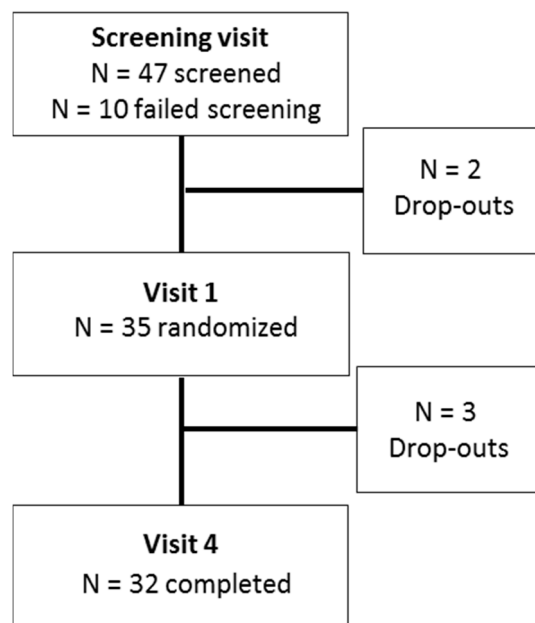

Supplemental Figure 1. Flow diagram of disposition of subjects throughout the study

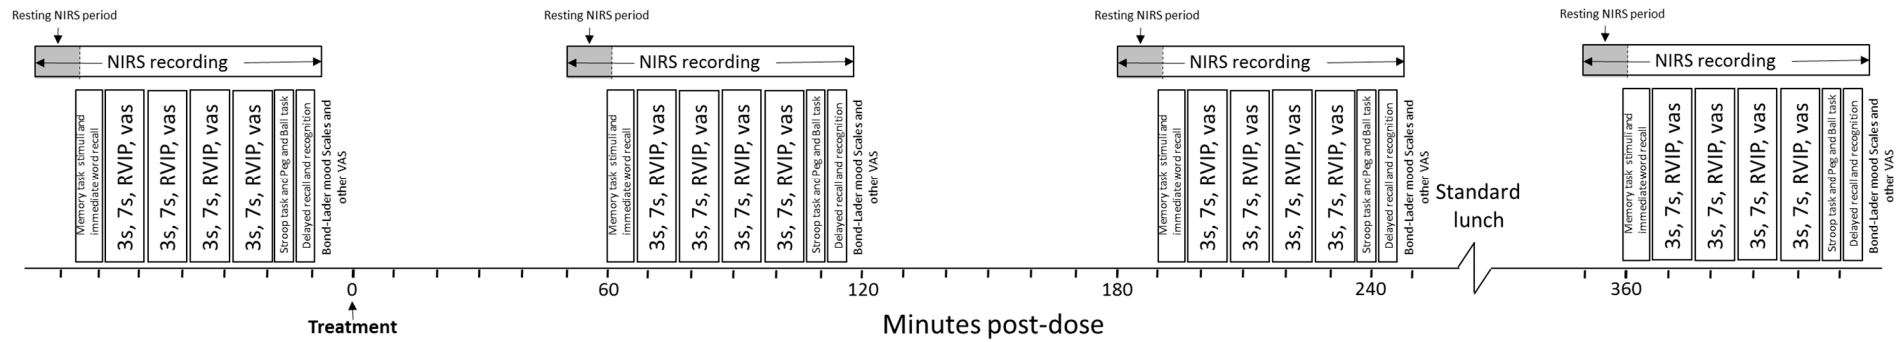

Supplemental Figure 2. Schedule of each testing visit. Participants arrived at 8am or 9am. They completed one baseline cognitive assessment, then sat quietly for 5 minutes before commencing a 10 minute pre-dose resting baseline Near Infrared Spectroscopy (NIRS) assessment. They then took their day’s treatment and 50 minutes post-dose underwent a 10-minute NIRS assessment while resting, which continued while they completed their first post-dose cognitive assessment (starting at 60 minutes post-dose). This post-dose assessment was repeated commencing at 170 minutes and 350 minutes post-dose.
